# Supplementary material for: The Development and Validation of the SWADOC: A Study Protocol for a Multicenter Prospective Cohort Study
Source: PubMed Central journal article supplement (PMC8116670; doi:10.3389/fneur.2021.662634), 2021-04-29
Supplement: Presentation_3.pdf [file Presentation_3.pdf]

**Supplementary Material 3. SWADOC-scored (French version)**

|                                | Items                                                                 | Niveau 0                                                                                                                             | Niveau 1                                                                                        | Niveau 2                                                                                                         | Niveau 3                                                                           |
|--------------------------------|-----------------------------------------------------------------------|--------------------------------------------------------------------------------------------------------------------------------------|-------------------------------------------------------------------------------------------------|------------------------------------------------------------------------------------------------------------------|------------------------------------------------------------------------------------|
| Phase orale                    | 1. Initiation d'ouverture buccale                                     | <input type="checkbox"/> Ouverture de la bouche impossible ou seulement sur aide active du thérapeute                                | <input type="checkbox"/> Ouverture buccale sur stimulation labiale                              | <input type="checkbox"/> Ouverture buccale à l'approche de la cuillère                                           | <input type="checkbox"/> Ouverture buccale sur commande (min 2/3)                  |
|                                | 2. Sécrétions endo-buccales                                           | <input type="checkbox"/> Sécrétions en quantité significative (80-100%)                                                              | <input type="checkbox"/> Sécrétions en quantité modérée (20-80%)                                | <input type="checkbox"/> Peu de sécrétions (0-20%)                                                               | <input type="checkbox"/> Bouche humide mais sans sécrétions significatives         |
|                                | 3. Préhension labiale                                                 | <input type="checkbox"/> Aucune préhension labiale (pas de réaction ou serrage des lèvres)                                           | <input type="checkbox"/> Préhension labiale incomplète en spontané ou sur stimulation verbale   | <input type="checkbox"/> Préhension labiale adéquate mais non-systématique ou uniquement sur stimulation verbale | <input type="checkbox"/> Préhension labiale correcte et spontanée systématiquement |
|                                | 4. Propulsion linguale                                                | <input type="checkbox"/> Aucun mouvement lingual : passage passif du bolus au niveau pharyngé, stagne en bouche ou ressort en bavage | <input type="checkbox"/> Quelques mouvements linguaux mais insuffisants pour propulser le bolus | <input type="checkbox"/> Propulsion linguale pathologique avec présence possible de stases post-déglutition      | <input type="checkbox"/> Propulsion linguale adéquate                              |
| Phase pharyngée                | 1. Initiation du réflexe de déglutition salivaire                     | <input type="checkbox"/> Pas de déglutition de salive que ce soit sur stimulation ou spontanément                                    | <input type="checkbox"/> Déglutition de salive uniquement sur stimulation                       | <input type="checkbox"/> Déglutition de salive spontanée et sur stimulation                                      | <input type="checkbox"/> Déglutition de salive sur commande (min 2/3)              |
|                                | 2. Latence de déclenchement du réflexe de déglutition sur stimulation | <input type="checkbox"/> Pas de déclenchement ou non-réalisable                                                                      | <input type="checkbox"/> > 10 sec                                                               | <input type="checkbox"/> Entre 5 et 10 secondes                                                                  | <input type="checkbox"/> Entre 0 et 5 secondes                                     |
|                                | 3. Trachéotomie                                                       | <input type="checkbox"/> Trachéotomie avec ballonnet gonflé                                                                          | <input type="checkbox"/> Trachéotomie avec ballonnet en cours de sevrage                        | <input type="checkbox"/> Trachéotomie sans ballonnet ou avec ballonnet dégonflé en permanence                    | <input type="checkbox"/> Trachéotomie en cours de sevrage, ou absente              |
|                                | 4. Respiration et encombrement haut et bas                            | <input type="checkbox"/> Bronchopneumonies fréquentes ou encombrement important                                                      | <input type="checkbox"/> Encombrement modéré                                                    | <input type="checkbox"/> Peu d'encombrement                                                                      | <input type="checkbox"/> Pas d'encombrement                                        |
| SWADOC-scored phase orale: /12 |                                                                       | SWADOC-scored phase pharyngée: /12                                                                                                   |                                                                                                 | SWADOC-scored total: /24                                                                                         |                                                                                    |
