# Supplementary material for: The Development and Validation of the SWADOC: A Study Protocol for a Multicenter Prospective Cohort Study
Source: PubMed Central journal article supplement (PMC8116670; doi:10.3389/fneur.2021.662634), 2021-04-29
Supplement: Presentation_4.pdf [file Presentation_4.pdf]

**Supplementary Material 4.** The FOTT-SAS (table adapted from Mortensen et al., 2016)

| Items                                                                                                                                 | Yes | No |
|---------------------------------------------------------------------------------------------------------------------------------------|-----|----|
| 1) Conscious and/or respond to verbal address?                                                                                        |     |    |
| 2) Able to sit upright with some degree of head control?                                                                              |     |    |
| 3) Oral transport of saliva?                                                                                                          |     |    |
| 4) Spontaneous or facilitated swallowing of saliva?                                                                                   |     |    |
| 5) Coughing following swallowing of saliva?                                                                                           |     |    |
| 6) Gurgling breath sound following swallowing of saliva?                                                                              |     |    |
| 7) Difficulties in breathing following swallowing of saliva?                                                                          |     |    |
| Based on the above questions, should oral intake be initiated?<br>(Oral intake should be initiated if items 1-4=Yes and items 5-7=No) |     |    |
